# Supplementary material for: Mutant myocilin impacts sarcomere ultrastructure in mouse gastrocnemius muscle
Source: PubMed Central journal article supplement (PMC6218065; doi:10.1371/journal.pone.0206801), 2018-11-05
Supplement: pone.0206801.s005.pdf [file pone.0206801.s005.pdf]

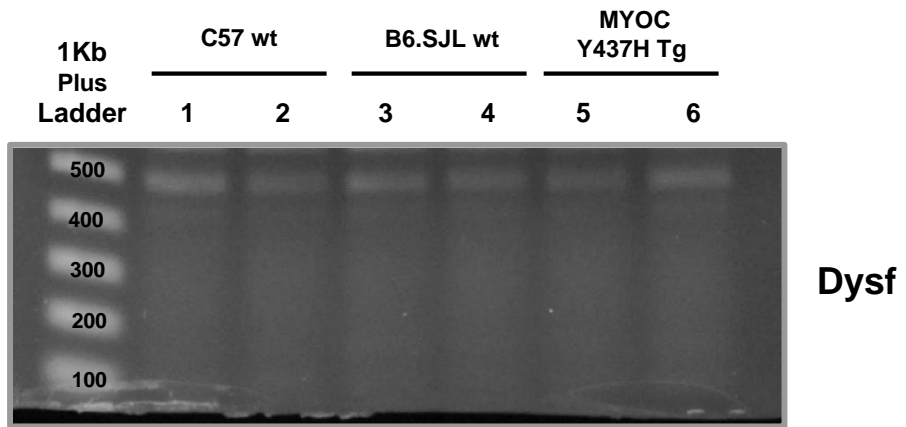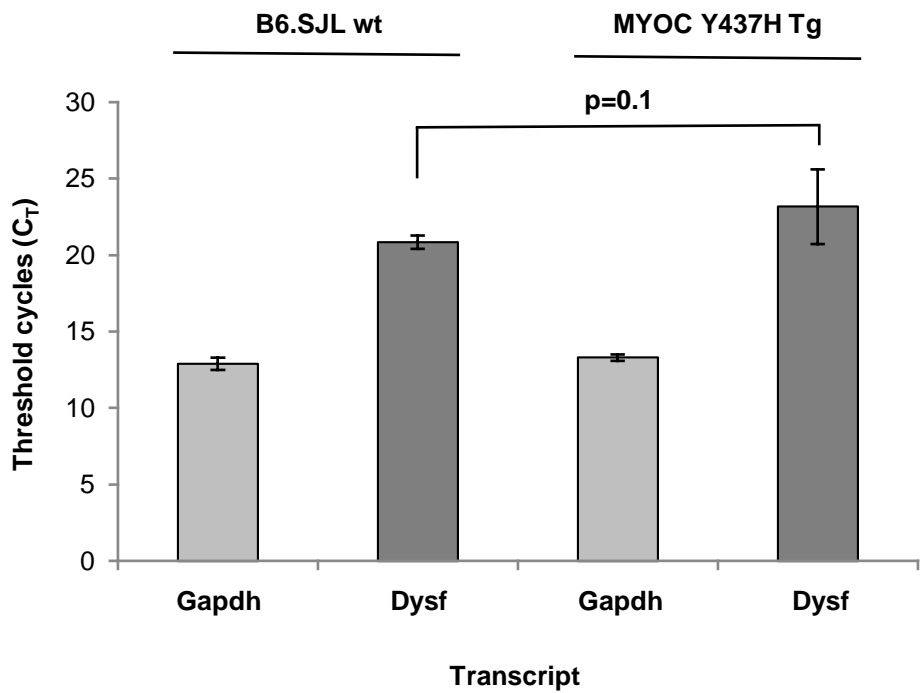

S5 Fig
