# Supplementary material for: Mutant myocilin impacts sarcomere ultrastructure in mouse gastrocnemius muscle
Source: PubMed Central journal article supplement (PMC6218065; doi:10.1371/journal.pone.0206801), 2018-11-05
Supplement: pone.0206801.s008.pdf [file pone.0206801.s008.pdf]

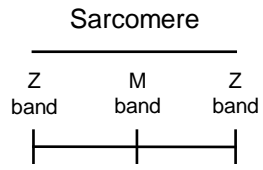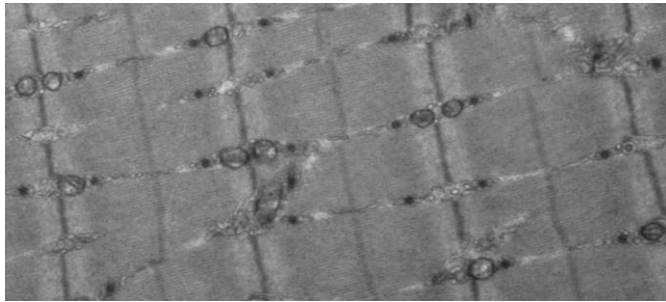

**C57  
wt**

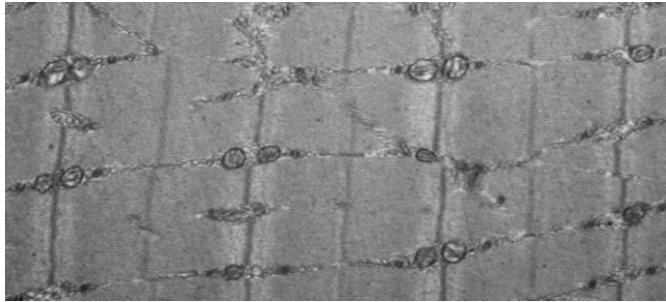

**wt  
MYOC BAC**

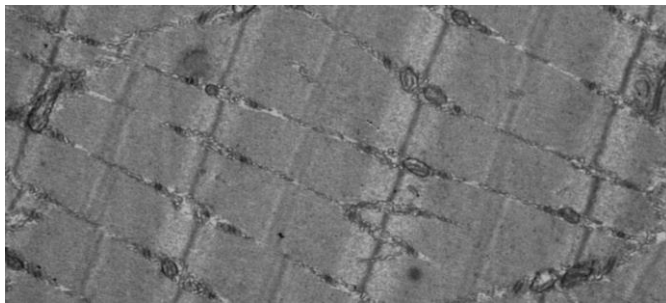

**Q368X  
MYOC BAC**

500 nm

**S8 Fig**
